# Supplementary material for: Connecting genetic risk to disease end points through the human blood plasma proteome
Source: PubMed Central journal article supplement (PMC5333359; doi:10.1038/ncomms14357), 2017-02-27
Supplement: ncomms14357-s1.pdf [file ncomms14357-s1.pdf]

**Supplementary Table 1: Published *cis*-pQTL studies in human blood.**

Study population, number of samples, protein features tested, *cis*-pQTLs found, and technique used for previously published *cis*-pQTL studies.

| <b>Study</b>                                 | <b>Study population</b> | <b>Samples</b> | <b>Proteins</b> | <b><i>Cis</i>-pQTLs</b> | <b>Technique</b> |
|----------------------------------------------|-------------------------|----------------|-----------------|-------------------------|------------------|
| Melzer <i>et al.</i> (2008) <sup>1</sup>     | Population study        | 1,200          | 42              | 8                       | Immuno-assay     |
| Lourdusamy <i>et al.</i> (2012) <sup>2</sup> | Elderly Europeans       | 96             | 778             | 60 <sup>+</sup>         | Aptamer-based    |
| Johansson <i>et al.</i> (2013) <sup>3</sup>  | Two population cohorts  | 1,060          | 163             | 5                       | MS               |
| Kim <i>et al.</i> (2013) <sup>4</sup>        | Alzheimer cohort        | 521            | 132             | 28                      | Immuno-assay     |
| Enroth <i>et al.</i> (2014) <sup>5</sup>     | Population study        | 970            | 77              | 18                      | Immuno-assay     |
| Liu <i>et al.</i> (2015) <sup>6</sup>        | Female twins            | 113            | 342             | 18 <sup>#</sup>         | MS               |

<sup>+</sup>reported at 5% FDR, <sup>#</sup>including one *trans*-pQTL

**Supplementary Table 2: Replication of pQTLs from GWAS studies with ELISA assays.**

Several GWAS with bio-medically relevant protein assays have been published. Here we report associations that match *cis*-eQTLs in our study (Locus number). In cases where the GWAS variant did not match the sentinel SNP of our association, we report the GWAS SNP identifier and the linkage disequilibrium  $r^2$ .

| Protein name                                 | Protein | Locus | Tag SNP               | Chr | Position    | P-value                | GWAS SNP ( $r^2$ ) | Reference                               |
|----------------------------------------------|---------|-------|-----------------------|-----|-------------|------------------------|--------------------|-----------------------------------------|
| Granulins                                    | GRN     | 71    | rs646776              | 1   | 109,818,530 | $1.0 \times 10^{-52}$  | same SNP           | Carrasquillo <i>et al.</i> <sup>7</sup> |
| Interleukin-6 receptor subunit alpha         | IL6R    | 2     | rs4129267             | 1   | 154,426,264 | $1.6 \times 10^{-265}$ | rs2228145 (1.0)    | Van Dongen <i>et al.</i> <sup>8</sup>   |
| P-Selectin                                   | SELP    | 158   | rs6136                | 1   | 169,563,951 | $1.1 \times 10^{-25}$  | same SNP           | Barbalic <i>et al.</i> <sup>9</sup>     |
| Interleukin-1 receptor-like 1                | IL1RL1  | 44    | rs12712135            | 2   | 102,930,948 | $4.4 \times 10^{-76}$  | rs950880 (0.53)    | Ho <i>et al.</i> <sup>10</sup>          |
| Adiponectin                                  | ADIPOQ  | -     | rs17366568            | 3   | 186,570,453 | $6.2 \times 10^{-7}$   | same SNP           | Heid <i>et al.</i> <sup>11</sup>        |
| Insulin-like growth factor-binding protein 3 | IGFBP3  | 178   | rs2949833             | 7   | 45,984,820  | $2.6 \times 10^{-22}$  | rs11977526 (0.59)  | Kaplan <i>et al.</i> <sup>12</sup>      |
| von Willebrand factor                        | VWF     | 36    | rs612169              | 9   | 136,143,442 | $1.2 \times 10^{-20}$  | rs657152 (0.89)    | Zabaneh <i>et al.</i> <sup>13</sup>     |
| sE-Selectin                                  | SELE    | 28    | rs651007              | 9   | 136,153,875 | $1.3 \times 10^{-96}$  | same SNP           | Qi <i>et al.</i> <sup>14,15</sup>       |
| sP-Selectin                                  | SELP    | 28    | rs651007              | 9   | 136,153,875 | $7.4 \times 10^{-13}$  | rs579459 (1.0)     | Barbalic <i>et al.</i> <sup>9</sup>     |
| Intercellular adhesion molecule 1            | ICAM1   | -     | rs651007 <sup>+</sup> | 9   | 136,153,875 | $3.5 \times 10^{-7}$   | same SNP           | Paré <i>et al.</i> <sup>16</sup>        |
| Serum amyloid A-1 protein                    | SAA1    | 22    | rs1993373             | 11  | 18,280,635  | $2.2 \times 10^{-105}$ | rs4638289 (0.99)   | Marzi <i>et al.</i> <sup>17</sup>       |
| Coagulation Factor VII                       | F7      | 58    | rs776905              | 13  | 113,781,942 | $9.2 \times 10^{-65}$  | rs561241 (0.53)    | Yang <i>et al.</i> <sup>18</sup>        |
| Haptoglobin                                  | HP      | 46    | rs2000999             | 16  | 72,114,002  | $7.4 \times 10^{-45}$  | same SNP           | Froguel <i>et al.</i> <sup>19</sup>     |
| Intercellular adhesion molecule 1            | ICAM1   | 1     | rs5498                | 19  | 10,395,683  | $7.7 \times 10^{-267}$ | same SNP           | Paré <i>et al.</i> <sup>16</sup>        |
| Cystatin-C                                   | CST3    | 293   | rs6036478             | 20  | 23,611,359  | $9.6 \times 10^{-15}$  | rs1158167 (0.94)   | Hwang <i>et al.</i> <sup>20</sup>       |
| Vitamin K-dependent protein C                | PROC    | 106   | rs867186              | 20  | 33,764,554  | $5.5 \times 10^{-38}$  | same SNP           | Tang <i>et al.</i> <sup>21</sup>        |

<sup>+</sup>Association p-value computed including *cis*-pQTL SNP rs5498 as additional co-variate to account for strong *cis*-encoded variance in ICAM1.

**Supplementary Table 3: Replication of *cis*-pQTLs in an independent study with the SomaLogic assay.**

Using the SomaLogic platform to analyse blood plasma samples of 100 individuals, Lourdasamy et al. <sup>2</sup> reported 60 *cis*-pQTLs at a false discovery rate of 5%. Here we report P-values from the KORA study using matching imputed SNPs, or, when these were not available, using a suitable tagging SNP ( $r^2 > 0.5$ , indicated below the P-value). Twelve associations lacked a suitable tagging SNP. A SNP-protein association was considered replicated if  $p < 0.05/120$ , conservatively correcting for 60 tests on imputed and tagging SNPs. 34 of 48 associations replicated, including the twenty strongest associations on the list.

| Protein                                                                     | SNP            | Chr | Position    | P-value<br>(Lourdusamy) | P-value<br>(this study)  | Replicated |
|-----------------------------------------------------------------------------|----------------|-----|-------------|-------------------------|--------------------------|------------|
| Tenascin (TNC)                                                              | rs7021589      | 9   | 117,804,667 | 1.50E-17                | 1.77E-63                 | YES        |
| Sialic acid-binding Ig-like lectin 9 (SIGLEC9)                              | rs2075803      | 19  | 51,628,529  | 9.63E-17                | 7.13E-122                | YES        |
| Platelet-derived growth factor receptor beta (PDGFRB)                       | rs2240781      | 5   | 149,516,480 | 4.42E-15                | 4.71E-161                | YES        |
| Low affinity immunoglobulin gamma Fc region receptor II-a/b (FCGR2A FCGR2B) | rs1801274      | 1   | 161,479,745 | 5.17E-15                | 1.24E-120                | YES        |
| Myeloid cell surface antigen CD33 (CD33)                                    | rs12985029     | 19  | 51,713,365  | 2.65E-13                | 1.76E-66                 | YES        |
| Teratocarcinoma-derived growth factor 1 (TDGF1)                             | chr3:46619238  | 3   | 46,619,238  | 7.10E-13                | 3.78E-145<br>(rs3806701) | YES        |
| Interleukin-1 Receptor accessory protein (IL1RAP)                           | rs724608       | 3   | 190,348,810 | 8.81E-13                | 1.16E-143                | YES        |
| Interleukin-6 receptor subunit alpha (IL6R)                                 | rs11265613     | 1   | 154,418,415 | 1.43E-12                | 1.25E-239                | YES        |
| Low affinity immunoglobulin gamma Fc region receptor II-a/b (FCGR2A FCGR2B) | rs6665610      | 1   | 161,641,384 | 1.27E-11                | 4.26E-160                | YES        |
| C-C motif chemokine 16 (CCL16)                                              | chr17:34306470 | 17  | 34,306,470  | 2.52E-11                | 1.91E-95<br>(rs33995560) | YES        |
| Serum amyloid A-1 protein (SAA1)                                            | chr11:18290906 | 11  | 18,290,906  | 1.16E-10                | 2.17E-105<br>(rs1993373) | YES        |
| CD109 antigen (CD109)                                                       | rs9447004      | 6   | 74,458,737  | 8.61E-10                | 1.56E-44                 | YES        |
| Mannose-binding protein C (MBL2)                                            | rs7899547      | 10  | 54,536,839  | 1.60E-9                 | 2.44E-102                | YES        |
| Low molecular weight phosphotyrosine protein phosphatase (ACP1)             | rs17713879     | 2   | 254,215     | 2.46E-9                 | 2.04E-215                | YES        |
| Coagulation Factor VII (F7)                                                 | rs474671       | 13  | 113,776,218 | 2.75E-9                 | 5.62E-65                 | YES        |

|                                                                              |                |    |             |         |                         |     |
|------------------------------------------------------------------------------|----------------|----|-------------|---------|-------------------------|-----|
| Complement C2 (C2)                                                           | chr6:31981247  | 6  | 31,981,247  | 3.70E-9 | n/a                     |     |
| Complement factor H (CFH)                                                    | rs1048663      | 1  | 196,674,982 | 2.94E-8 | 4.53E-25                | YES |
| Chitotriosidase-1 (CHIT1)                                                    | rs2486950      | 1  | 203,174,670 | 3.15E-8 | 7.82E-111               | YES |
| Ephrin type-A receptor 1 (EPHA1)                                             | rs1804527      | 7  | 143,088,823 | 4.34E-8 | 4.50E-67                | YES |
| A disintegrin and metalloproteinase with thrombospondin motifs 13 (ADAMTS13) | rs28647808     | 9  | 136,305,530 | 5.45E-8 | 2.61E-42                | YES |
| Alpha-2-HS-glycoprotein (AHSG)                                               | rs2070632      | 3  | 186,334,004 | 7.31E-8 | 2.00E-34                | YES |
| Interleukin-22 (IL22)                                                        | rs7133527      | 12 | 68,357,125  | 4.60E-7 | 8.02E-1                 | NO  |
| Interleukin-17 receptor A (IL17RA)                                           | rs2241047      | 22 | 17,586,583  | 6.35E-7 | 3.99E-96                | YES |
| 26S proteasome non-ATPase regulatory subunit 7 (PSMD7)                       | rs7359422      | 16 | 74,592,483  | 8.49E-7 | 1.46E-2                 | NO  |
| Interleukin-1 receptor-like 1 (IL1RL1)                                       | rs12470864     | 2  | 102,926,362 | 8.85E-7 | 2.96E-69                | YES |
| Myeloblastin (PRTN3)                                                         | rs7251804      | 19 | 839,948     | 9.49E-7 | 8.30E-2                 | NO  |
| Interleukin-12 receptor subunit beta-2 (IL12RB2)                             | chr1:67489003  | 1  | 67,489,003  | 9.82E-7 | n/a                     |     |
| Junctional adhesion molecule C (JAM3)                                        | rs11223763     | 11 | 134,214,549 | 1.60E-6 | 8.43E-1                 | NO  |
| Tumor-associated calcium signal transducer 2 (TACSTD2)                       | rs232815       | 1  | 59,080,879  | 2.18E-6 | 3.68E-1                 | NO  |
| Endothelial monocyte-activating polypeptide 2 (AIMP1)                        | chr4:107298048 | 4  | 107,298,048 | 3.56E-6 | 0.022<br>(rs17275627)   | NO  |
| Complement factor H-related protein 5 (CFHR5)                                | rs6695321      | 1  | 196,675,861 | 4.13E-6 | 9.70E-20                | YES |
| Granulysin (GNLY)                                                            | rs7577293      | 2  | 85,935,282  | 4.85E-6 | 4.70E-76                | YES |
| Ectonucleoside triphosphate diphosphohydrolase 1 (ENTPD1)                    | rs72822592     | 10 | 97,180,509  | 5.54E-6 | 5.25E-1                 | NO  |
| C-X-C motif chemokine 5 (CXCL5)                                              | chr4:74596624  | 4  | 74,596,624  | 7.29E-6 | n/a                     |     |
| Interleukin-18 receptor 1 (IL18R1)                                           | chr2:102951851 | 2  | 102,951,851 | 8.26E-6 | 1.09E-26<br>(rs1882510) | YES |
| Kininogen-1 (KNG1)                                                           | rs5030049      | 3  | 186,450,863 | 1.11E-5 | 1.37E-96                | YES |
| Lymphotactin (XCL1)                                                          | rs1933112      | 1  | 168,521,417 | 1.33E-5 | 6.47E-7                 | YES |
| Cadherin-6 (CDH6)                                                            | rs13165280     | 5  | 31,578,552  | 1.39E-5 | 4.51E-1                 | NO  |
| Phospholipase A2, membrane associated (PLA2G2A)                              | rs11573156     | 1  | 20,306,146  | 1.95E-5 | 9.64E-39                | YES |
| C-C motif chemokine 15 (CCL15)                                               | rs854624       | 17 | 34,327,923  | 2.00E-5 | 2.49E-119               | YES |

|                                                             |                |    |             |         |                        |     |
|-------------------------------------------------------------|----------------|----|-------------|---------|------------------------|-----|
| Microtubule-associated protein tau (MAPT)                   | rs73317026     | 17 | 44,081,268  | 2.12E-5 | n/a                    |     |
| Lymphotoxin alpha1:beta2 (LTA LTB)                          | rs9267054      | 6  | 31,397,367  | 2.21E-5 | n/a                    |     |
| Protein kinase C beta type (splice variant beta-II) (PRKCB) | rs7499480      | 16 | 23,825,207  | 2.95E-5 | 8.08E-1                | NO  |
| Interleukin-25 (IL25)                                       | chr14:23770877 | 14 | 23,770,877  | 3.00E-5 | n/a                    |     |
| Apolipoprotein E (APOE)                                     | rs2967668      | 19 | 45,302,951  | 4.15E-5 | 1.38E-4                | YES |
| Kallikrein-5 (KLK5)                                         | rs266863       | 19 | 51,355,650  | 4.50E-5 | 8.01E-2                | NO  |
| Tyrosine-protein kinase transmembrane receptor ROR1 (ROR1)  | rs71499308     | 1  | 64,666,320  | 4.68E-5 | n/a                    |     |
| Lymphocyte antigen 86 (LY86)                                | rs9405302      | 6  | 6,477,849   | 5.10E-5 | 6.59E-1                | NO  |
| Interleukin-10 (IL10)                                       | chr1:207234422 | 1  | 207,234,422 | 6.04E-5 | n/a                    |     |
| Parathyroid hormone-related protein (PTH1H)                 | chr12:27848777 | 12 | 27,848,777  | 6.25E-5 | n/a                    |     |
| Complement C4b (C4A C4B)                                    | rs2844452      | 6  | 31,882,024  | 6.72E-5 | n/a                    |     |
| Cathepsin S (CTSS)                                          | chr1:150868102 | 1  | 150,868,102 | 7.65E-5 | 9.49E-17<br>(rs267738) | YES |
| Intercellular adhesion molecule 1 (ICAM1)                   | chr19:10082034 | 19 | 10,082,034  | 9.87E-5 | 0.82<br>(rs12461154)   | NO  |
| Pyridoxal phosphate phosphatase (PDXP)                      | rs5995497      | 22 | 38,182,706  | 1.00E-4 | 2.17E-2                | NO  |
| Metalloproteinase inhibitor 3 (TIMP3)                       | rs2413151      | 22 | 33,167,869  | 1.07E-4 | 6.39E-100              | YES |
| NADPH--cytochrome P450 reductase (POR)                      | rs11770797     | 7  | 75,855,511  | 1.09E-4 | 1.58E-6                | YES |
| Carboxypeptidase B2 (CPB2)                                  | rs2094247      | 13 | 46,602,162  | 1.17E-4 | 5.89E-73               | YES |
| Matrix metalloproteinase-17 (MMP17)                         | rs10751701     | 12 | 132,330,735 | 1.21E-4 | 4.12E-1                | NO  |

**Supplementary Table 4: Replication of *cis*-pQTLs using the Myriad Rules Based Medicine Human DiscoveryMAP.**

Using the multiplex immunoassay of the Myriad Rules Based Medicine (RBM) Human DiscoveryMAP panel v1.0 on the LumineX100 platform to analyse samples from 521 participants of the ADNI cohort, Kim et al. <sup>4</sup> reported 28 *cis*-pQTLs at a significance level of  $p < 2.44 \times 10^{-5}$ . (Table 3 in <sup>4</sup>). Here we report P-values from the KORA study for 17 matching imputed SNP-protein pairs. For two proteins no matching SNP was found, nine proteins were not covered by the SomaLogic panel. A SNP-protein association was considered replicated if  $p < 0.05/17$ . Thirteen out of 17 associations replicated, including the eight strongest associations in the list.

| Protein                                     | SNP        | Chr | Position    | P-value<br>(Kim et al.) | P-value<br>(this study) | Replicated |
|---------------------------------------------|------------|-----|-------------|-------------------------|-------------------------|------------|
| Complement factor H (CFH)                   | rs6677604  | 1   | 196,686,918 | 9.29E-112               | 1.59E-13                | YES        |
| Complement factor H (CFH)                   | rs7517126  | 1   | 196,840,272 | 1.46E-60                | 7.61E-08                | YES        |
| Interleukin-6 receptor subunit alpha (IL6R) | rs4129267  | 1   | 154,426,264 | 1.56E-58                | 8.79E-266               | YES        |
| Alpha-2-HS-glycoprotein (AHSG)              | rs2070633  | 3   | 186,335,941 | 4.50E-31                | 1.86E-38                | YES        |
| Apolipoprotein E (isoform E2) (APOE)        | rs429358   | 19  | 45,411,941  | 7.27E-30                | 1.77E-12                | YES        |
| C-C motif chemokine 18 (CCL18)              | rs854462   | 17  | 34,386,090  | 9.15E-24                | 2.96E-47                | YES        |
| Interleukin-16 (IL16)                       | rs4778636  | 15  | 81,591,639  | 5.08E-19                | 3.93E-27                | YES        |
| C-C motif chemokine 16 (CCL16)              | rs11080369 | 17  | 34,305,164  | 8.03E-19                | 1.36E-92                | YES        |
| Angiotensinogen (AGT)                       | rs4762     | 1   | 230,845,977 | 4.74E-18                | 0.0301                  | NO         |
| C-C motif chemokine 23 (CCL23)              | rs854656   | 17  | 34,345,661  | 2.61E-13                | 2.26E-03                | YES        |
| C-C motif chemokine 8 (CCL8)                | rs12602195 | 17  | 32,660,149  | 2.40E-12                | 3.79E-11                | YES        |
| Neuronal cell adhesion molecule (NRCAM)     | rs10487849 | 7   | 107,987,085 | 1.36E-08                | 0.661                   | NO         |
| Coagulation Factor VII (F7)                 | rs488703   | 13  | 113,770,876 | 2.00E-08                | 1.30E-63                | YES        |
| Alpha-1-antitrypsin (SERPINA1)              | rs7151526  | 14  | 94,863,636  | 7.44E-07                | 0.0215                  | NO         |
| Epidermal growth factor receptor (EGFR)     | rs13244925 | 7   | 55,192,256  | 9.12E-07                | 0.0553                  | NO         |
| Intercellular adhesion molecule 1 (ICAM1)   | rs1799969  | 19  | 10,394,792  | 1.03E-06                | 7.90E-36                | YES        |
| Cystatin-C (CST3)                           | rs2424590  | 20  | 23,636,980  | 4.75E-06                | 3.78E-13                | YES        |

**Supplementary Table 5: Replication of *cis*-pQTLs using the Olink Proseek Multiplex Oncology I96x96 kit.**

Using 92 proteins measured in blood plasma of 1,005 individuals with the Olink Proseek Multiplex Oncology I<sup>96x96</sup> kit and quantified by real-time PCR using the Fluidigm BioMark HD real-time PCR, Enroth et al. <sup>6</sup> identified 23 *cis*-pQTLs (Table 3 in <sup>6</sup>). Here we report P-values from the KORA study for 18 matching imputed SNP-protein pairs. For one protein no matching SNP was found, four were not covered by the SomaLogic panel. A SNP-protein association was considered replicated if  $p < 0.05/18$ . Twelve out of 18 associations were replicated.

| Protein                                           | SNP         | Chr | Position    | P-value<br>(Enroth et al.) | P-value<br>(this study) | Replicated |
|---------------------------------------------------|-------------|-----|-------------|----------------------------|-------------------------|------------|
| Interleukin-6 receptor subunit alpha (IL6R)       | rs4129267   | 1   | 154,426,264 | 4.39E-58                   | 8.79E-266               | YES        |
| C-X-C motif chemokine 10 (CXCL10)                 | rs11548618  | 4   | 76,943,947  | 6.78E-37                   | 4.86E-21                | YES        |
| C-C motif chemokine 24 (CCL24)                    | rs6946822   | 7   | 75,479,448  | 2.02E-36                   | 1.83E-01                | NO         |
| C-X-C motif chemokine 5 (CXCL5)                   | rs425535    | 4   | 74,863,997  | 4.27E-26                   | 1.21E-09                | YES        |
| C-X-C motif chemokine 5 (CXCL5)                   | rs2472649   | 4   | 74,857,708  | 3.57E-21                   | 1.80E-06                | YES        |
| interleukin-17 receptor B (IL17RB)                | rs6801605   | 3   | 53,876,218  | 1.75E-18                   | 7.48E-19                | YES        |
| Kallikrein-11 (KLK11)                             | rs117268623 | 19  | 51,527,970  | 5.25E-18                   | 4.97E-03                | NO         |
| Melanoma-derived growth regulatory protein (MIA)  | rs2230694   | 19  | 41,263,403  | 6.83E-17                   | 9.69E-69                | YES        |
| Interleukin-12 (IL12A IL12B)                      | rs10045431  | 5   | 158,814,533 | 8.99E-17                   | 9.03E-01                | NO         |
| Melanoma-derived growth regulatory protein (MIA)  | rs2233159   | 19  | 41,283,365  | 1.07E-16                   | 1.12E-69                | YES        |
| Melanoma-derived growth regulatory protein (MIA)  | rs2607426   | 19  | 41,274,713  | 1.13E-16                   | 1.05E-69                | YES        |
| Melanoma-derived growth regulatory protein (MIA)  | rs2233154   | 19  | 41,281,346  | 1.13E-16                   | 1.83E-69                | YES        |
| E-Selectin (SELE)                                 | rs507666    | 9   | 136,149,399 | 5.01E-16                   | 8.47E-118               | YES        |
| MHC class I polypeptide-related sequence A (MICA) | rs3869132   | 6   | 31,410,948  | 5.33E-16                   | 1.12E-91                | YES        |
| C-C motif chemokine 19 (CCL19)                    | rs7775228   | 6   | 32,658,079  | 2.63E-13                   | 3.21E-06                | YES        |
| C-C motif chemokine 24 (CCL24)                    | rs11465293  | 7   | 75,442,723  | 7.95E-13                   | 4.71E-01                | NO         |
| MHC class I polypeptide-related sequence A (MICA) | rs2263316   | 6   | 31,421,297  | 1.02E-08                   | 3.97E-03                | NO         |
| C-X-C motif chemokine 5 (CXCL5)                   | rs2393967   | 10  | 65,133,156  | 4.54E-08                   | 2.87E-01                | NO         |

**Supplementary Table 6: Proteins with a replicated pQTL that have a biomarker application.**

Annotation as biomarker application derived from Ingenuity Pathway Analysis (IPA) database.

| <b>Target</b>              | <b>Protein (Gene Symbol)</b>                            | <b>Biomarker Application(s)</b>                                          |
|----------------------------|---------------------------------------------------------|--------------------------------------------------------------------------|
| 6Ckine                     | C-C motif chemokine 21 (CCL21)                          | disease progression                                                      |
| Alkaline phosphatase, bone | Alkaline phosphatase, tissue-nonspecific isozyme (ALPL) | efficacy, safety                                                         |
| Angiogenin                 | Angiogenin (ANG)                                        | response to therapy                                                      |
| annexin II                 | Annexin A2 (ANXA2)                                      | diagnosis                                                                |
| BCAM                       | Basal Cell Adhesion Molecule (BCAM)                     | diagnosis                                                                |
| b-Endorphin                | Beta-endorphin (POMC)                                   | diagnosis, efficacy                                                      |
| bFGF                       | Fibroblast growth factor 2 (FGF2)                       | diagnosis, efficacy, prognosis                                           |
| Cadherin-5                 | Cadherin-5 (CDH5)                                       | diagnosis                                                                |
| CD23                       | Low affinity immunoglobulin epsilon Fc receptor (FCER2) | diagnosis                                                                |
| Chitotriosidase-1          | Chitotriosidase-1 (CHIT1)                               | efficacy                                                                 |
| Coagulation Factor V       | Coagulation Factor V (F5)                               | diagnosis                                                                |
| Cripto                     | Teratocarcinoma-derived growth factor 1 (TDGF1)         | diagnosis                                                                |
| ECM1                       | Extracellular matrix protein 1 (ECM1)                   | diagnosis                                                                |
| Fibronectin                | Fibronectin (FN1)                                       | diagnosis, efficacy, prognosis                                           |
| G-CSF                      | Granulocyte colony-stimulating factor (CSF3)            | diagnosis                                                                |
| Gro-a                      | Growth-regulated alpha protein (CXCL1)                  | disease progression                                                      |
| Haptoglobin, Mixed Type    | Haptoglobin (HP)                                        | diagnosis, efficacy                                                      |
| IGFBP-3                    | Insulin-like growth factor-binding protein 3 (IGFBP3)   | diagnosis, disease progression, efficacy, prognosis, safety              |
| IL-6 sRa                   | Interleukin-6 receptor subunit alpha (IL6R)             | efficacy                                                                 |
| IR                         | Insulin receptor (INSR)                                 | prognosis                                                                |
| MBL                        | Mannose-binding protein C (MBL2)                        | diagnosis                                                                |
| Met                        | Hepatocyte growth factor receptor (MET)                 | diagnosis, disease progression, efficacy, prognosis, response to therapy |
| MIA                        | Melanoma-derived growth regulatory protein (MIA)        | disease progression, prognosis                                           |
| MICA                       | MHC class I polypeptide-related sequence A (MICA)       | safety                                                                   |
| MICB                       | MHC class I polypeptide-related sequence B (MICB)       | safety                                                                   |
| MIP-1a                     | C-C motif chemokine 3 (CCL3)                            | diagnosis, efficacy, prognosis                                           |



|             |                                                           |                                                                       |
|-------------|-----------------------------------------------------------|-----------------------------------------------------------------------|
| MMP-1       | Interstitial collagenase (MMP1)                           | diagnosis, efficacy, safety                                           |
| MMP-12      | Macrophage metalloelastase (MMP12)                        | efficacy                                                              |
| MMP-8       | Neutrophil collagenase (MMP8)                             | efficacy                                                              |
| Notch 1     | Neurogenic locus notch homolog protein 1 (NOTCH1)         | diagnosis, efficacy                                                   |
| NPS-PLA2    | Phospholipase A2, membrane associated (PLA2G2A)           | efficacy, prognosis, safety                                           |
| PARC        | C-C motif chemokine 18 (CCL18)                            | efficacy, safety                                                      |
| PDGF Rb     | Platelet-derived growth factor receptor beta (PDGFRB)     | prognosis, response to therapy                                        |
| Protein C   | Vitamin K-dependent protein C (PROC)                      | diagnosis, efficacy                                                   |
| P-Selectin  | P-Selectin (SELP)                                         | efficacy, safety                                                      |
| RET         | Proto-oncogene tyrosine-protein kinase receptor Ret (RET) | efficacy, response to therapy                                         |
| SAA         | Serum amyloid A-1 protein (SAA1)                          | diagnosis                                                             |
| sE-Selectin | E-Selectin (SELE)                                         | diagnosis, disease progression, efficacy                              |
| sICAM-1     | Intercellular adhesion molecule 1 (ICAM1)                 | diagnosis, efficacy, prognosis                                        |
| Siglec-3    | Myeloid cell surface antigen CD33 (CD33)                  | efficacy                                                              |
| sLeptin R   | Leptin receptor (LEPR)                                    | prognosis                                                             |
| sL-Selectin | L-Selectin (SELL)                                         | efficacy                                                              |
| SPARCL1     | SPARC-like protein 1 (SPARCL1)                            | disease progression                                                   |
| SPINT2      | Kunitz-type protease inhibitor 2 (SPINT2)                 | diagnosis                                                             |
| sTie-2      | Angiopoietin-1 receptor, soluble (TEK)                    | efficacy                                                              |
| TECK        | C-C motif chemokine 25 (CCL25)                            | disease progression                                                   |
| TIMP-3      | Metalloproteinase inhibitor 3 (TIMP3)                     | diagnosis, prognosis                                                  |
| VEGF sR2    | Vascular endothelial growth factor receptor 2 (KDR)       | disease progression, efficacy, prognosis, response to therapy, safety |
| VEGF sR3    | Vascular endothelial growth factor receptor 3 (FLT4)      | diagnosis, disease progression, efficacy, prognosis                   |
| vWF         | von Willebrand factor (VWF)                               | diagnosis, efficacy, prognosis                                        |

**Supplementary Table 7: Proteins with a replicated pQTL that are targeted by a drug.**

Annotation as drug target derived from Ingenuity Pathway Analysis (IPA) database.

| Target                  | TargetFullName (EntrezGeneSymbol)                                   | Targeted by drug(s)                                                               |
|-------------------------|---------------------------------------------------------------------|-----------------------------------------------------------------------------------|
| AMPM2                   | Methionine aminopeptidase 2 (METAP2)                                | nitroxoline, beloranib, PPI-2458, ...                                             |
| Angiostatin             | Angiostatin (PLG)                                                   | tenecteplase, PLAT, tranexamic acid, ...                                          |
| annexin I               | Annexin A1 (ANXA1)                                                  | hydrocortisone,<br>hydrocortisone/prednisone,<br>hydrocortisone/mitoxantrone, ... |
| Apo B                   | Apolipoprotein B (APOB)                                             | mipomersen                                                                        |
| bFGF                    | Fibroblast growth factor 2 (FGF2)                                   | pentosan polysulfate, suradista, sucralfate,<br>...                               |
| C1r                     | Complement C1r subcomponent (C1R)                                   | SERPING1                                                                          |
| C1s                     | Complement C1s subcomponent (C1S)                                   | SERPING1                                                                          |
| Carbonic anhydrase 6    | Carbonic anhydrase 6 (CA6)                                          | methazolamide, hydrochlorothiazide,<br>acetazolamide, ...                         |
| Carbonic anhydrase XIII | Carbonic anhydrase 13 (CA13)                                        | methazolamide, hydrochlorothiazide,<br>acetazolamide, ...                         |
| Caspase-3               | Caspase-3 (CASP3)                                                   | emricasan                                                                         |
| Catalase                | Catalase (CAT)                                                      | fomepizole                                                                        |
| Coagulation Factor V    | Coagulation Factor V (F5)                                           | drotrecogin alfa, antithrombin alfa                                               |
| Coagulation Factor VII  | Coagulation Factor VII (F7)                                         | nematode anticoagulant protein c2                                                 |
| ER                      | Estrogen receptor (ESR1)                                            | 17-alpha-ethinylestradiol, fulvestrant, beta-estradiol, ...                       |
| FCG3B                   | Low affinity immunoglobulin gamma Fc region receptor III-B (FCGR3B) | IgG                                                                               |
| Fibronectin             | Fibronectin (FN1)                                                   | ocriplasmin                                                                       |
| G-CSF                   | Granulocyte colony-stimulating factor (CSF3)                        | filgrastim                                                                        |
| Heparin cofactor II     | Heparin cofactor 2 (SERPIND1)                                       | ardeparin, glucuronyl glucosamine glycan sulfate                                  |
| IL-1b                   | Interleukin-1 beta (IL1B)                                           | canakinumab, gevokizumab,<br>canakinumab/INS, ...                                 |
| IL-6 sRa                | Interleukin-6 receptor subunit alpha (IL6R)                         | tocilizumab                                                                       |
| IL-7 Ra                 | Interleukin-7 receptor subunit alpha (IL7R)                         | recombinant human interleukin-7                                                   |
| IMDH1                   | Inosine-5'-monophosphate dehydrogenase 1 (IMPDH1)                   | thioguanine, VX-944, pegINTRON/ribavirin, ...                                     |
| IMDH2                   | Inosine-5'-monophosphate dehydrogenase 2 (IMPDH2)                   | thioguanine, VX-944, pegINTRON/ribavirin, ...                                     |
| IP-10                   | C-X-C motif chemokine 10 (CXCL10)                                   | MDX-1100                                                                          |
| IR                      | Insulin receptor (INSR)                                             | insulin detemir, INS, canakinumab/INS, ...                                        |
| Met                     | Hepatocyte growth factor receptor (MET)                             | crizotinib, tivantinib, cabozantinib, ...                                         |

|               |                                                                                       |                                                                         |
|---------------|---------------------------------------------------------------------------------------|-------------------------------------------------------------------------|
| MMP-1         | Interstitial collagenase (MMP1)                                                       | marimastat                                                              |
| MMP-12        | Macrophage metalloelastase (MMP12)                                                    | marimastat                                                              |
| MMP-7         | Matrilysin (MMP7)                                                                     | marimastat                                                              |
| MMP-8         | Neutrophil collagenase (MMP8)                                                         | marimastat                                                              |
| MP2K2         | Dual specificity mitogen-activated protein kinase kinase 2 (MAP2K2)                   | selumetinib, trametinib, dabrafenib/trametinib, ...                     |
| NPS-PLA2      | Phospholipase A2, membrane associated (PLA2G2A)                                       | varespladib methyl, varespladib, indomethacin, ...                      |
| PDE5A         | cGMP-specific 3',5'-cyclic phosphodiesterase (PDE5A)                                  | dyphylline, nitroglycerin, udenafil, ...                                |
| PDGF Rb       | Platelet-derived growth factor receptor beta (PDGFRB)                                 | nilotinib, dasatinib, sunitinib, ...                                    |
| PDK1          | [Pyruvate dehydrogenase (acetyl-transferring)] kinase isozyme 1, mitochondrial (PDK1) | dichloroacetic acid                                                     |
| Plasminogen   | Plasminogen (PLG)                                                                     | tenecteplase, PLAT, tranexamic acid, ...                                |
| Prekallikrein | Plasma kallikrein (KLKB1)                                                             | aprotinin, ecallantide                                                  |
| RET           | Proto-oncogene tyrosine-protein kinase receptor Ret (RET)                             | sunitinib, motesanib, cabozantinib, ...                                 |
| Siglec-3      | Myeloid cell surface antigen CD33 (CD33)                                              | arsenic trioxide/gemtuzumab ozogamicin/tretinoin, gemtuzumab ozogamicin |
| sLeptin R     | Leptin receptor (LEPR)                                                                | recombinant-methionyl human leptin                                      |
| sTie-2        | Angiopoietin-1 receptor, soluble (TEK)                                                | cabozantinib, regorafenib, ponatinib, ...                               |
| VEGF sR2      | Vascular endothelial growth factor receptor 2 (KDR)                                   | AEE 788, sunitinib, cediranib, ...                                      |
| VEGF sR3      | Vascular endothelial growth factor receptor 3 (FLT4)                                  | sunitinib, pazopanib, axitinib, ...                                     |

### Supplementary Table 8: Metabolomics QTLs

List of 14 mQTLs from metabolomics GWAS that overlap with pQTLs reported here; only the lead target protein (SomaLogic annotation) for each locus is listed, together with the locus number; mQTLs are limited to the strongest association signal and requiring  $p < 10^{-8}$  and  $p\text{-gain} > 10^4$ ; all associations for each locus, and also further less significant associations can be obtained from <http://gwas.eu>.

| Target                | Locus | SNP        | Chr | Position    | P-value | P-gain  | Metabolite/-ratio                                     |
|-----------------------|-------|------------|-----|-------------|---------|---------|-------------------------------------------------------|
| sE-Selectin           | 28    | rs651007   | 9   | 136,153,875 | 7.0E-34 | 9.0E+13 | ADSGEGDFXAEGGGVR / ADpSGEGDFXAEGGGVR <sup>1</sup>     |
| DC-SIGN               | 36    | rs505922   | 9   | 136,149,229 | 4.5E-34 | 1.7E+21 | ADSGEGDFXAEGGGVR / ADpSGEGDFXAEGGGVR                  |
| Coagulation Factor XI | 96    | rs5030062  | 3   | 186,454,180 | 5.9E-13 | -       | bradykinin, des-arg(9)                                |
| Factor H              | 111   | rs10737680 | 1   | 196,679,455 | 2.9E-09 | -       | HWESASXX                                              |
| Mn SOD                | 113   | rs2545801  | 5   | 176,841,339 | 9.6E-18 | -       | bradykinin, des-arg(9)                                |
| SAA                   | 121   | rs4150579  | 11  | 18,357,180  | 2.6E-26 | 1.4E+05 | 3-(4-hydroxyphenyl)lactate / alpha-hydroxyisovalerate |
| IGF-II receptor       | 127   | rs2297363  | 6   | 160,506,462 | 5.2E-09 | -       | isobutyrylcarnitine                                   |
| Prekallikrein         | 138   | rs1511802  | 4   | 187,150,806 | 4.3E-28 | -       | bradykinin, des-arg(9)                                |
| PPID                  | 156   | rs8396     | 4   | 159,630,817 | 3.3E-59 | 4.2E+27 | octanoylcarnitine / X-13435                           |
| Kininogen, HMW        | 288   | rs3856930  | 3   | 186,458,322 | 4.2E-11 | -       | bradykinin, des-arg(9)                                |
| IGF-II receptor       | 315   | rs9295123  | 6   | 160,570,114 | 1.7E-09 | -       | isobutyrylcarnitine                                   |
| sE-Selectin           | 354   | rs8176720  | 9   | 136,132,873 | 2.5E-11 | 2.3E+04 | ADpSGEGDFXAEGGGVR / leucylalanine                     |
| IGF-II receptor       | 358   | rs12202350 | 6   | 160,379,096 | 5.1E-18 | -       | isobutyrylcarnitine                                   |
| AK1A1                 | 441   | rs6662572  | 1   | 46,146,812  | 6.5E-10 | -       | erythritol                                            |

<sup>1</sup>ADSGEGDFXAEGGGVR / ADpSGEGDFXAEGGGVR is a measure for fibrinogen A-alpha phosphorylation

**Supplementary Table 9: Overlapping hits with disease GWAS associations.**

List of overlapping disease GWAS hits (GWAS catalogue via SNIIPA) and publicly available summary statistics data from 14 large disease GWAS consortia (p-value cut-off  $<10^{-9}$ ); curated to eliminate duplicated entries and non-disease endpoints, such as height, response to medication, and lipid traits; only the lead target protein (SomaLogic annotation) for each locus is listed, together with the locus number, further details can be obtained online.

| Target      | Locus | SNP        | Chr | Position    | Curated Trait                      | Source         |
|-------------|-------|------------|-----|-------------|------------------------------------|----------------|
| IL-6 sRa    | 2     | rs4129267  | 1   | 154,426,264 | Asthma                             | GWAS catalogue |
| IL-6 sRa    | 2     | rs4129267  | 1   | 154,426,264 | Pulmonary function                 | GWAS catalogue |
| MSP         | 4     | rs9858542  | 3   | 49,701,983  | Crohn's disease                    | GWAS catalogue |
| MSP         | 4     | rs9858542  | 3   | 49,701,983  | Educational attainment             | GWAS catalogue |
| MSP         | 4     | rs9858542  | 3   | 49,701,983  | Inflammatory bowel disease         | GWAS catalogue |
| MSP         | 4     | rs9858542  | 3   | 49,701,983  | Primary sclerosing cholangitis     | GWAS catalogue |
| MSP         | 4     | rs9858542  | 3   | 49,701,983  | Ulcerative colitis                 | GWAS catalogue |
| sLeptin R   | 5     | rs17415296 | 1   | 66,099,013  | Fasting plasma glucose (childhood) | GWAS catalogue |
| Siglec-3    | 7     | rs12459419 | 19  | 51,728,477  | Alzheimer's disease                | GWAS catalogue |
| ARTS1       | 11    | rs26496    | 5   | 96,137,882  | Ankylosing spondylitis             | GWAS catalogue |
| MICA        | 13    | rs2844511  | 6   | 31,389,784  | Rheumatoid Arthritis               | GWAS consortia |
| ARTS1       | 14    | rs17482078 | 5   | 96,118,866  | Behcet's disease                   | GWAS catalogue |
| FCG2A/B     | 16    | rs7551957  | 1   | 161,470,042 | Inflammatory bowel disease         | GWAS catalogue |
| FCG2A/B     | 16    | rs7551957  | 1   | 161,470,042 | Kawasaki disease                   | GWAS catalogue |
| FCG2A/B     | 16    | rs7551957  | 1   | 161,470,042 | Systemic lupus erythematosus       | GWAS catalogue |
| FCG2A/B     | 16    | rs7551957  | 1   | 161,470,042 | Ulcerative colitis                 | GWAS catalogue |
| IL-18 Ra    | 19    | rs2058622  | 2   | 102,985,424 | Atopic dermatitis                  | GWAS catalogue |
| IL-18 Ra    | 19    | rs2058622  | 2   | 102,985,424 | Celiac disease                     | GWAS catalogue |
| IL-18 Ra    | 19    | rs2058622  | 2   | 102,985,424 | Crohn's disease                    | GWAS catalogue |
| IL-18 Ra    | 19    | rs2058622  | 2   | 102,985,424 | Inflammatory bowel disease         | GWAS catalogue |
| sE-Selectin | 28    | rs651007   | 9   | 136,153,875 | Heart disease                      | GWAS catalogue |
| sE-Selectin | 28    | rs651007   | 9   | 136,153,875 | Stroke                             | GWAS catalogue |
| sE-Selectin | 28    | rs651007   | 9   | 136,153,875 | Venous thromboembolism             | GWAS catalogue |
| GPC5        | 37    | rs342706   | 13  | 92,417,058  | Lung cancer                        | GWAS catalogue |
| IL-1 R4     | 44    | rs12712135 | 2   | 102,930,948 | Leprosy                            | GWAS catalogue |
| ILT-4       | 48    | rs103294   | 19  | 54,797,848  | Prostate cancer                    | GWAS catalogue |
| CPNE1       | 50    | rs2425143  | 20  | 34,350,666  | Obesity related traits             | GWAS consortia |
| G-CSF       | 54    | rs5167     | 19  | 45,448,465  | Alzheimer's disease                | GWAS consortia |

|                       |     |            |    |             |                                   |                |
|-----------------------|-----|------------|----|-------------|-----------------------------------|----------------|
| FCRL3                 | 64  | rs7522061  | 1  | 157,668,390 | Graves' disease                   | GWAS catalogue |
| FCRL3                 | 64  | rs7522061  | 1  | 157,668,390 | Multiple sclerosis                | GWAS catalogue |
| Cadherin-5            | 69  | rs8176749  | 9  | 136,131,188 | Intraocular pressure              | GWAS catalogue |
| GRN                   | 71  | rs646776   | 1  | 109,818,530 | Heart disease                     | GWAS catalogue |
| GRN                   | 71  | rs646776   | 1  | 109,818,530 | Stroke                            | GWAS catalogue |
| TXD12                 | 95  | rs11715835 | 3  | 48,770,732  | Inflammatory bowel disease        | GWAS consortia |
| MICB                  | 105 | rs3094005  | 6  | 31,465,047  | Schizophrenia                     | GWAS consortia |
| Protein C             | 106 | rs867186   | 20 | 33,764,554  | Amyotrophic lateral sclerosis     | GWAS catalogue |
| MMP-12                | 107 | rs17368582 | 11 | 102,738,075 | Local histogram emphysema pattern | GWAS catalogue |
| Factor H              | 111 | rs10737680 | 1  | 196,679,455 | Age-related macular degeneration  | GWAS catalogue |
| SAA                   | 121 | rs4150579  | 11 | 18,357,180  | Pancreatic cancer                 | GWAS catalogue |
| MSP                   | 130 | rs13063312 | 3  | 48,661,985  | Inflammatory bowel disease        | GWAS consortia |
| MSP                   | 130 | rs13063312 | 3  | 48,661,985  | Ulcerative colitis                | GWAS consortia |
| C4b                   | 137 | rs2280774  | 6  | 31,928,691  | Rheumatoid Arthritis              | GWAS consortia |
| Factor B              | 142 | rs4151669  | 6  | 31,915,144  | Rheumatoid Arthritis              | GWAS consortia |
| Cathepsin B           | 145 | rs3947     | 8  | 11,702,375  | Parkinson's disease               | GWAS catalogue |
| C34 gp41 HIV Fragment | 159 | rs387608   | 6  | 31,941,557  | Rheumatoid Arthritis              | GWAS consortia |
| Properdin             | 177 | rs7529589  | 1  | 196,658,279 | Age-related macular degeneration  | GWAS catalogue |
| MICB                  | 180 | rs3132645  | 6  | 30,409,249  | Schizophrenia                     | GWAS consortia |
| MICB                  | 198 | rs2248372  | 6  | 31,446,466  | Rheumatoid Arthritis              | GWAS consortia |
| MICB                  | 199 | rs3129682  | 6  | 29,283,672  | Barrett's esophagus               | GWAS catalogue |
| MICB                  | 199 | rs3129682  | 6  | 29,283,672  | Schizophrenia                     | GWAS consortia |
| Factor B              | 200 | rs550513   | 6  | 31,920,687  | Rheumatoid Arthritis              | GWAS consortia |
| Cathepsin S           | 201 | rs1336900  | 1  | 150,679,033 | Fat body mass                     | GWAS catalogue |
| MICB                  | 206 | rs1794282  | 6  | 32,666,526  | Rheumatoid Arthritis              | GWAS consortia |
| MICB                  | 206 | rs1794282  | 6  | 32,666,526  | Schizophrenia                     | GWAS consortia |
| SAA                   | 233 | rs16935432 | 11 | 18,470,487  | Amyotrophic lateral sclerosis     | GWAS catalogue |
| C4                    | 235 | rs8283     | 6  | 32,083,300  | Rheumatoid Arthritis              | GWAS consortia |
| CPNE1                 | 244 | rs1204656  | 20 | 33,982,846  | Obesity related traits            | GWAS consortia |
| MICA                  | 245 | rs3134942  | 6  | 32,168,771  | Rheumatoid Arthritis              | GWAS consortia |
| IL-23 R               | 251 | rs11209026 | 1  | 67,705,958  | Ankylosing spondylitis            | GWAS catalogue |
| IL-23 R               | 251 | rs11209026 | 1  | 67,705,958  | Crohn's disease                   | GWAS catalogue |
| IL-23 R               | 251 | rs11209026 | 1  | 67,705,958  | Inflammatory bowel disease        | GWAS catalogue |
| IL-23 R               | 251 | rs11209026 | 1  | 67,705,958  | Psoriasis                         | GWAS catalogue |
| IL-23 R               | 251 | rs11209026 | 1  | 67,705,958  | Ulcerative colitis                | GWAS catalogue |
| MICB                  | 253 | rs33932084 | 6  | 28,268,824  | Schizophrenia                     | GWAS consortia |

|                |     |            |    |            |                                     |                |
|----------------|-----|------------|----|------------|-------------------------------------|----------------|
| MICB           | 260 | rs2534674  | 6  | 31,465,103 | Rheumatoid Arthritis                | GWAS consortia |
| MICA           | 271 | rs4418214  | 6  | 31,391,401 | HIV-1 susceptibility, HIV-1 control | GWAS catalogue |
| Cystatin C     | 293 | rs6036478  | 20 | 23,611,359 | Chronic kidney disease              | GWAS catalogue |
| RET            | 294 | rs2795502  | 10 | 43,340,662 | Progressive supranuclear palsy      | GWAS catalogue |
| RUXF           | 306 | rs4420638  | 19 | 45,422,946 | Age-related macular degeneration    | GWAS catalogue |
| RUXF           | 306 | rs4420638  | 19 | 45,422,946 | Alzheimer's disease                 | GWAS catalogue |
| RUXF           | 306 | rs4420638  | 19 | 45,422,946 | Longevity                           | GWAS catalogue |
| C7             | 314 | rs7713972  | 5  | 40,552,474 | Crohn's disease                     | GWAS consortia |
| a1-Antitrypsin | 320 | rs4905179  | 14 | 94,795,492 | Breast size                         | GWAS catalogue |
| MICB           | 330 | rs35555795 | 6  | 26,509,382 | Schizophrenia                       | GWAS consortia |
| NKG2D          | 332 | rs2255336  | 12 | 10,532,326 | Obesity-related traits              | GWAS catalogue |
| MICA           | 342 | rs2523987  | 6  | 30,079,993 | Rheumatoid Arthritis                | GWAS consortia |
| MICA           | 342 | rs2523987  | 6  | 30,079,993 | Schizophrenia                       | GWAS consortia |
| C4             | 372 | rs2239805  | 6  | 32,411,376 | Rheumatoid Arthritis                | GWAS consortia |
| C4             | 372 | rs2239805  | 6  | 32,411,376 | Schizophrenia                       | GWAS consortia |
| TARC           | 377 | rs983545   | 3  | 16,959,652 | Primary biliary cirrhosis           | GWAS catalogue |
| C4b            | 379 | rs204888   | 6  | 32,089,142 | Rheumatoid Arthritis                | GWAS consortia |
| granzyme A     | 387 | rs2853928  | 6  | 31,257,511 | Schizophrenia                       | GWAS consortia |
| annexin I      | 436 | rs4745216  | 9  | 75,744,157 | Schizophrenia                       | GWAS catalogue |

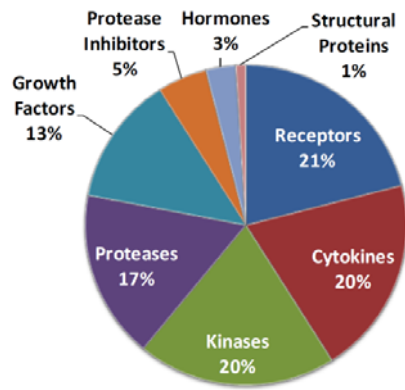

(A)

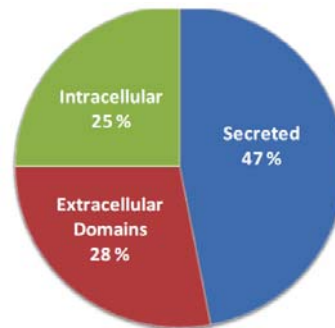

(B)

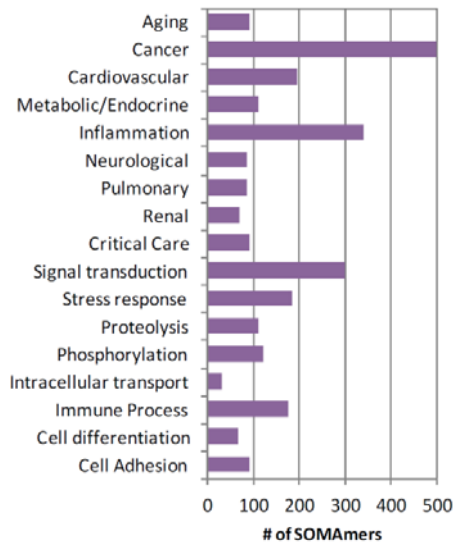

(C)

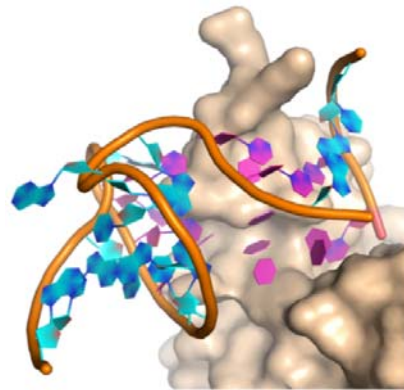

(D)

### Supplementary Figure 1: Protein types and classes covered by the SOMAscan panel.

The SOMAscan panel used in this study comprises 1,129 aptamers (**Supplementary Data 2**). These bind proteins in numerous disease areas and physiological processes (A); The aptamers have been generated to target various classes of proteins (B), covering secreted, intracellular and extracellular domains of proteins (C); Example of an X-ray crystal structure of an aptamer bound to a protein (D); Technical details of the SOMAscan assay are provided in the SomaLogic Technical Whitepaper (available at <http://www.somalogic.com/Resources/White-Papers-and-Tech-Notes.aspx>).



**Haptoglobin, Mixed Type (Uniprot: P00738, ProbeID: 3054--)**

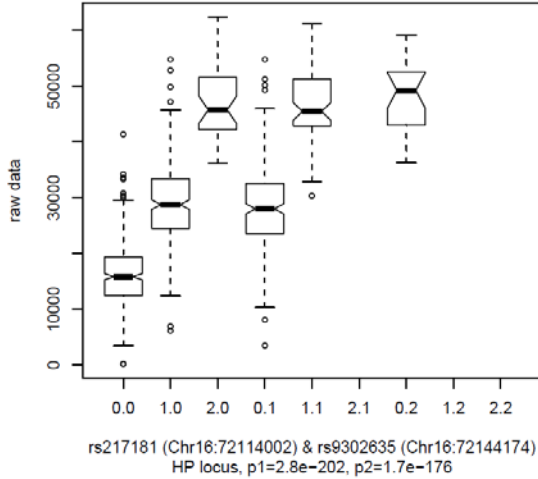

(A)

**BST1 (Uniprot: Q10588, ProbeID: 4535-50\_2)**

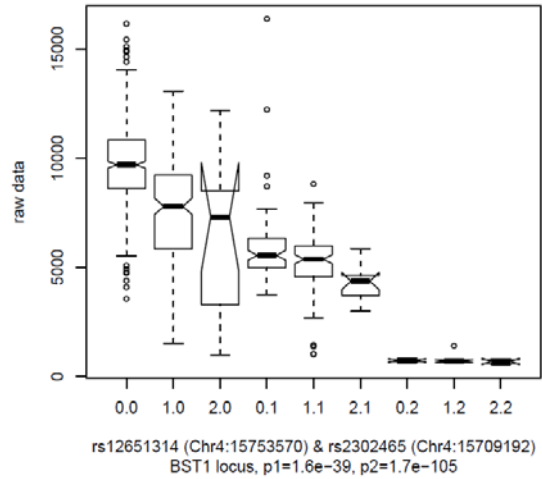

(B)

**MICA (Uniprot: Q29983, ProbeID: 2730-58\_2)**

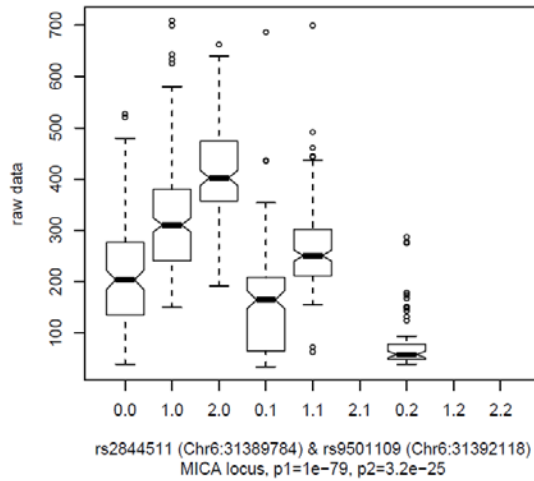

(C)

**IL-6 sRa (Uniprot: P08887, ProbeID: 4139-71\_2)**

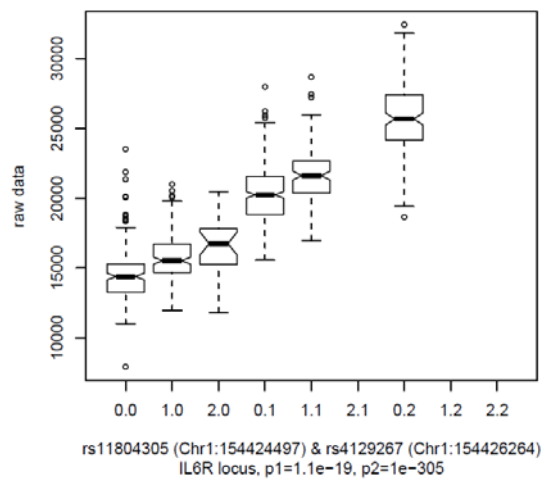

(D)

FCG2A/B (Uniprot: P12318 P31994, ProbelID: 3310-62\_1)

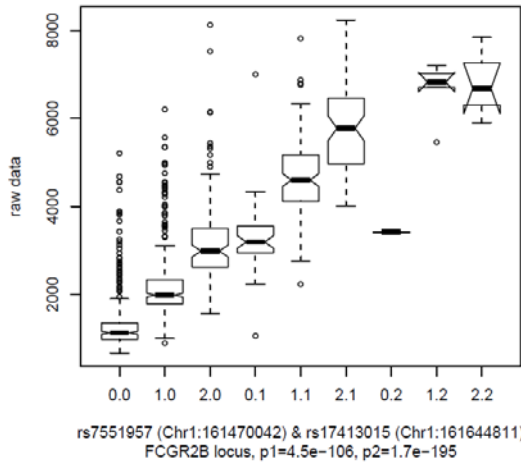

(E)

IL-18 Ra (Uniprot: Q13478, ProbelID: 3446-7\_2)

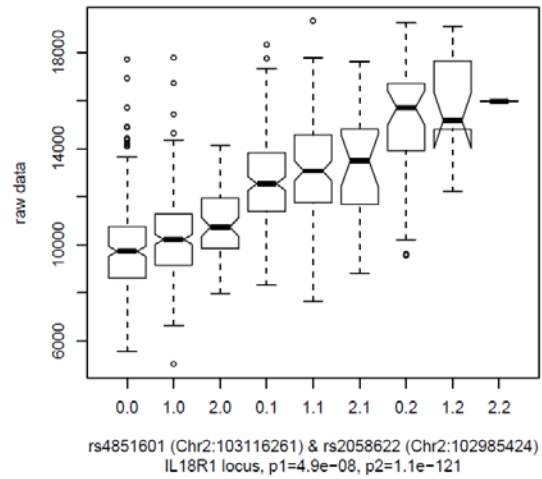

(F)

ILT-2 (Uniprot: Q8NHL6, ProbelID: 5090-49\_2)

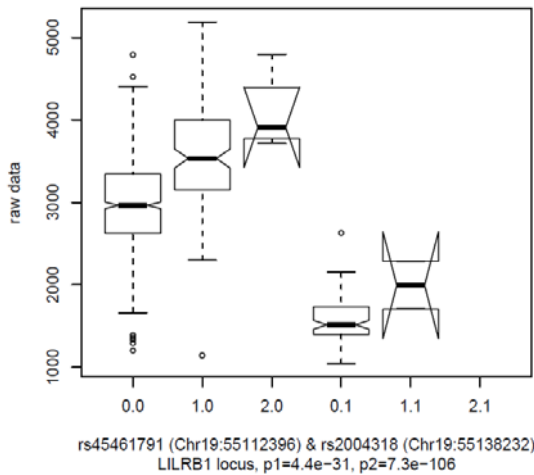

(G)

Fucosyltransferase 3 (Uniprot: P21217, ProbelID: 4548-4\_)

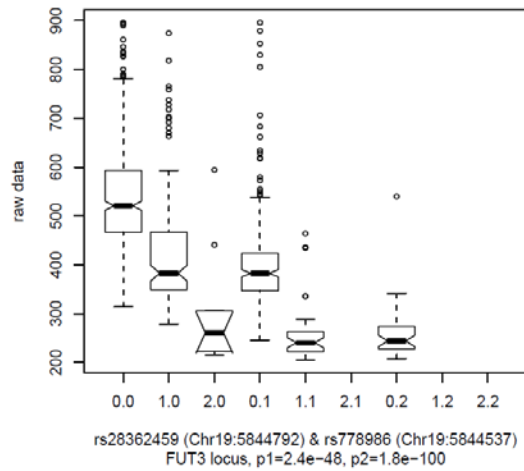

(H)

**Supplementary Figure 2: Examples of proteins associated with multiple genetic variants.**

Boxplots of protein levels (unscaled data) as a function of two genotypes, labelled by the number of the respective minor allele variants; P-values are for the contribution of each variant in a combined linear model with all covariates and unscaled protein levels as dependent variable; Outliers that were more than four standard deviations from the mean were removed here to optimize the plot area.

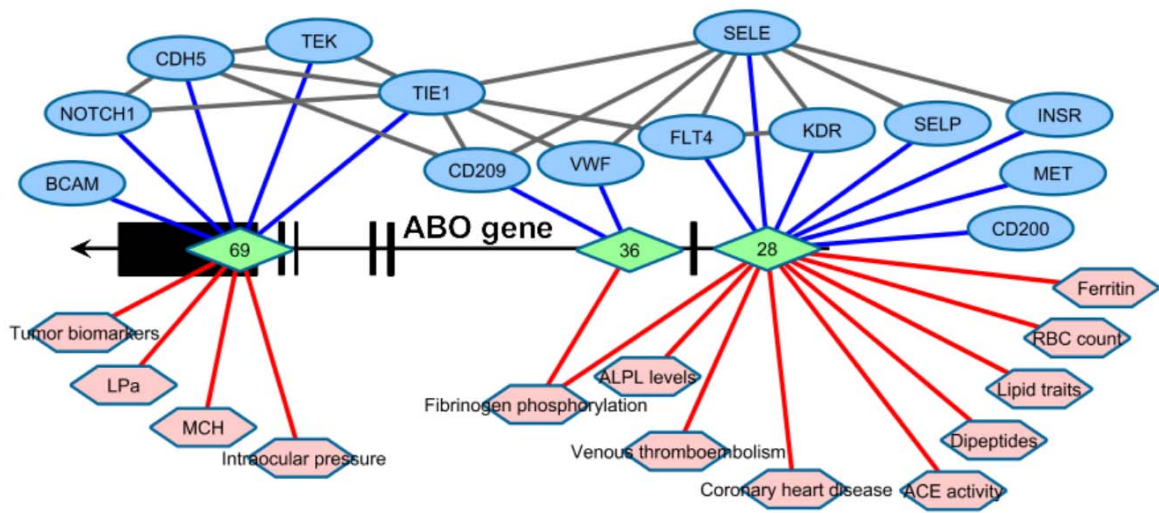

**Supplementary Figure 3: Network view of the ABO locus.**

Replicated associations of the three strongest variants at the ABO locus (gene structure in black) with protein plasma levels (green diamonds & blue lines); Partial correlations between proteins (blue ellipses & grey lines); previously reported GWAS associations (pink hexagons & red lines).

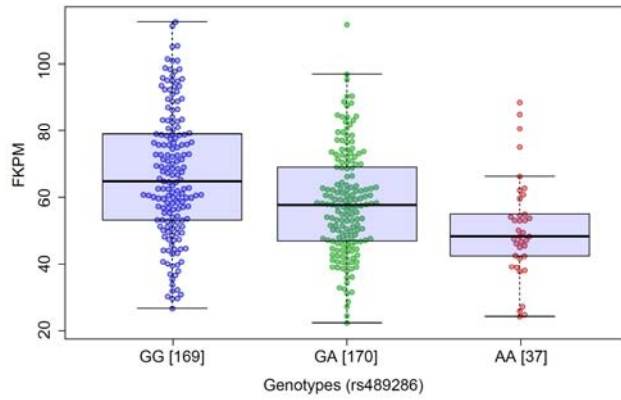

(A)

**SLAF7 (Uniprot: Q9NQ25, ProbeID: 5487-7\_3)**

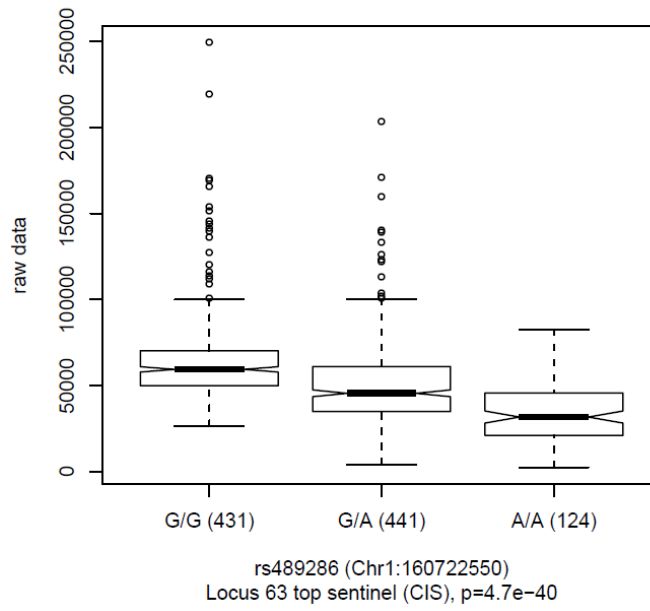

(B)

**Supplementary Figure 4: SLAMF7 protein and gene expression.**

Boxplots of SLAMF7 mRNA expression levels in lymphoblastoid cells (A) and protein levels of SLAMF7 (aka SLAF7) in blood (B).

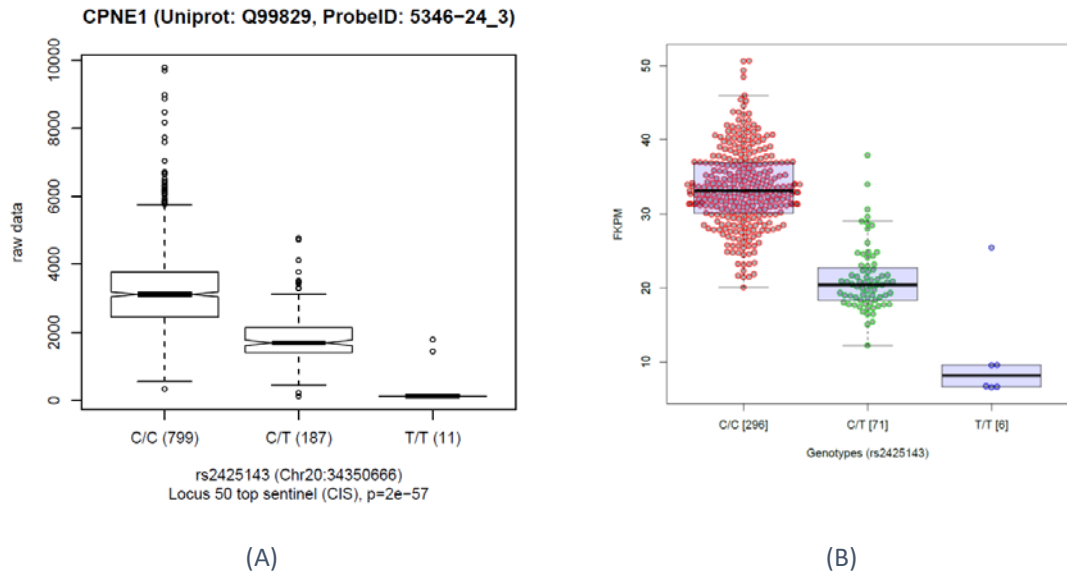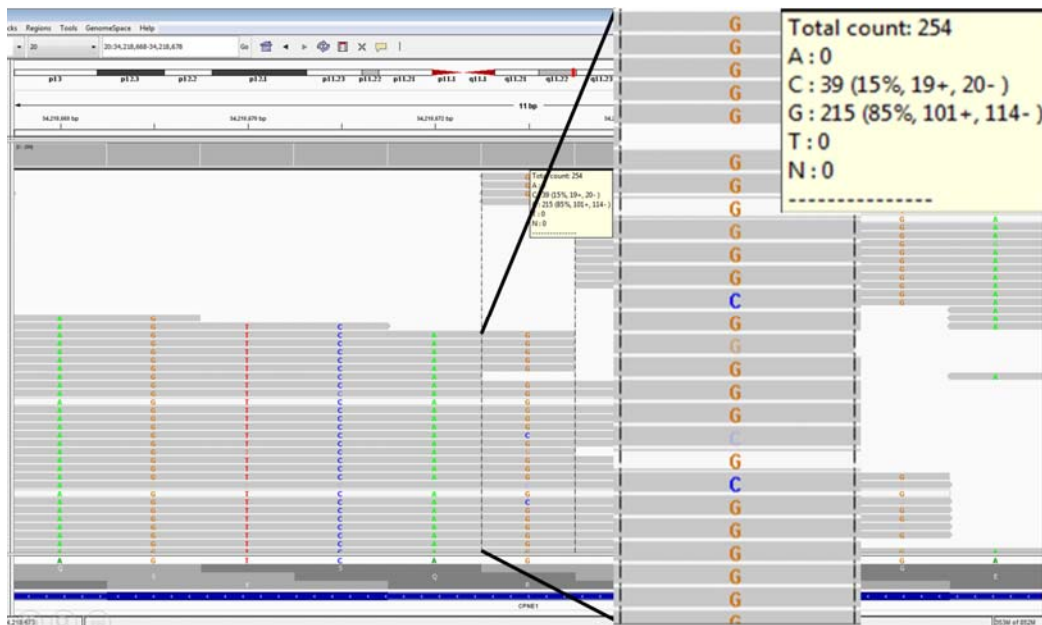

**Supplementary Figure 5: Allele specific mRNA expression of CPNE1.**

Near total protein ablation of CPNE1 protein levels in rs2425143\_T homozygotes (A), confirmed by mRNA expression (normalized read counts, FPKM) in lymphoblastoid cell lines of the 1000 Genomes Project as a function of rs2425143 genotype (B), and an example of allele specific mRNA expression analysis (CPNE1 read-alignments and variant calls for a rs2425143 heterozygote; the highlighted variant is located inside the CPNE1 transcript) (C).

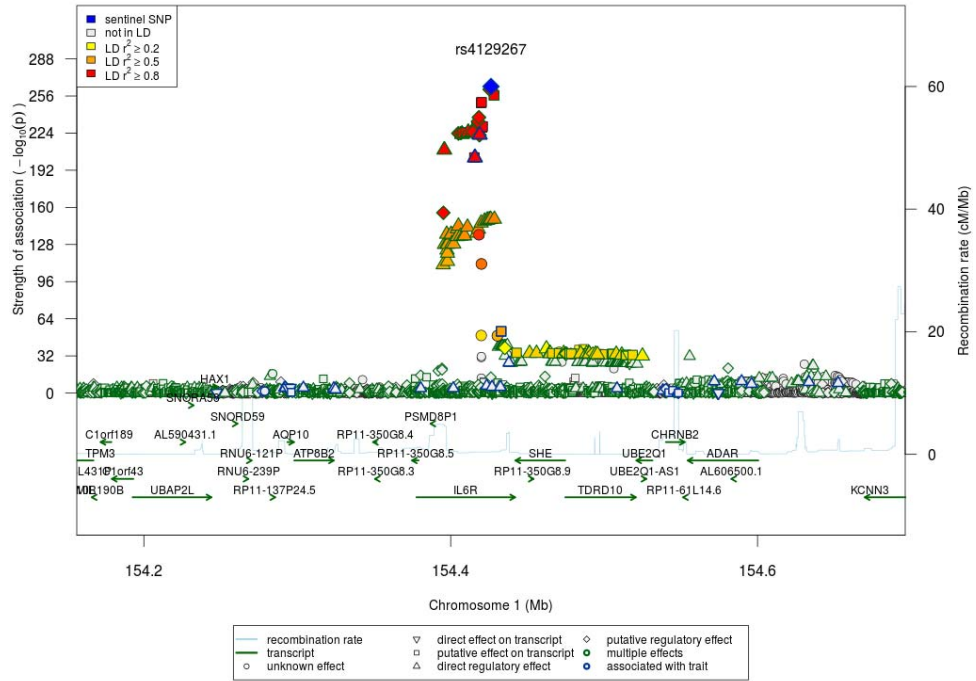

**Supplementary Figure 6: Regional association plots for all significant *cis*- and *trans*-associations.** Regional association plots using 1000-Genomes imputed genotypes in KORA for all 539 SNP-probe associations are provided as PNG files. The corresponding raw association data is provided as ASCII files. Plots and data can be accessed online.

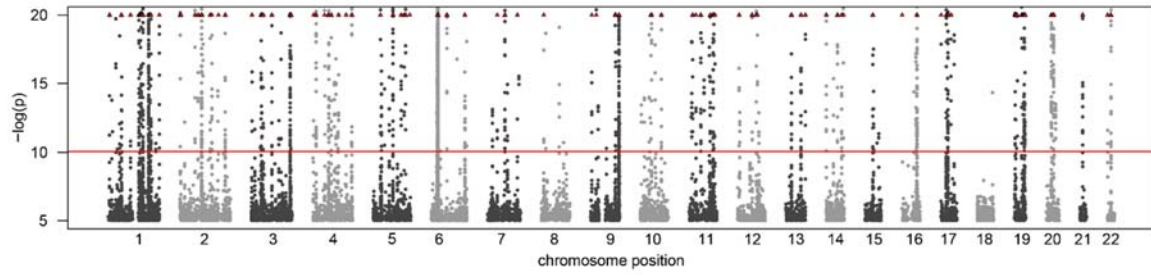

**Supplementary Figure 7: Manhattan plot.**

Red line: Bonferroni level of significance, associations with  $p < 10^{-20}$  are marked by a red triangle.

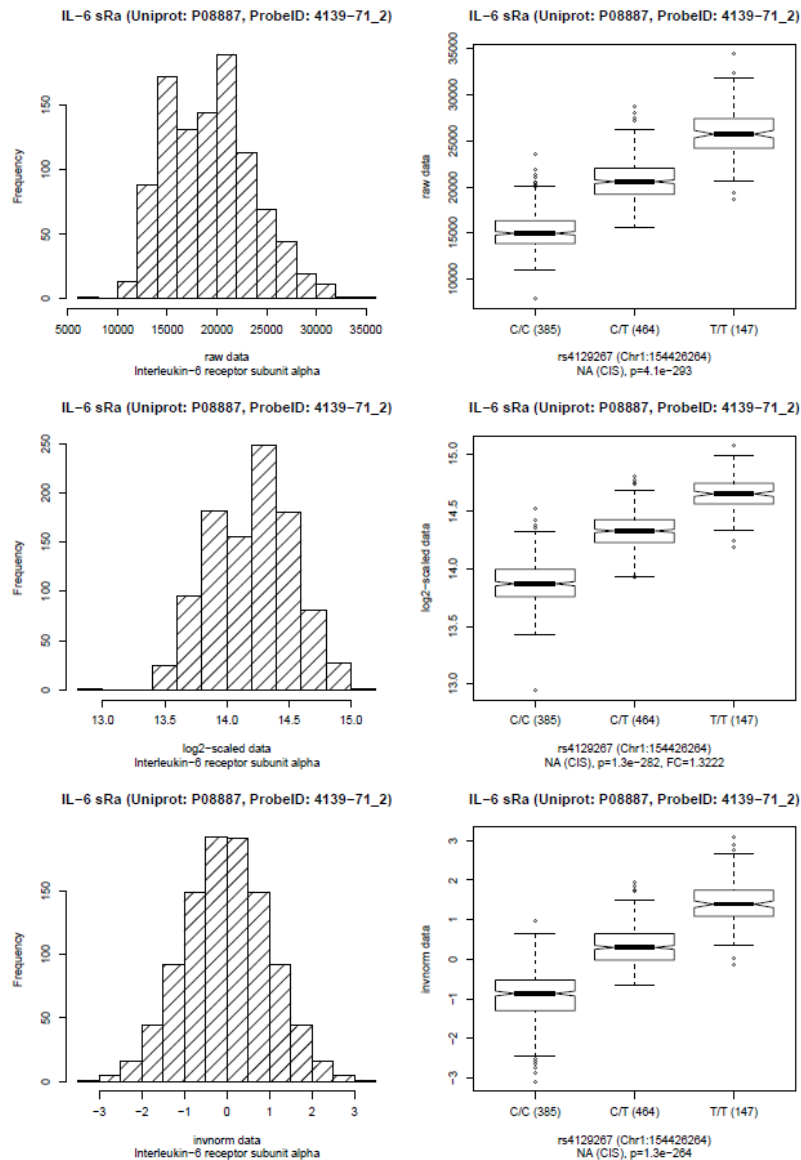

**Supplementary Figure 8: Histograms and boxplots for all significant *cis*- and *trans*-associations.** Histograms and boxplots using three different scaling methods (raw, log<sub>2</sub>, inverse-normal) with association data and allele counts are provided as a separate PDF file for all significant 539 SNP-protein associations in KORA and all 462 replication attempts in QMDiab. These plots can also be accessed online.



## SNiPAcard

| Block annotations                   |                                      |                               |                                                                                              |            |
|-------------------------------------|--------------------------------------|-------------------------------|----------------------------------------------------------------------------------------------|------------|
| <b>Block info</b>                   |                                      |                               |                                                                                              |            |
| genomic range                       | chr1:47,257,669-47,424,594 <i>e!</i> |                               |                                                                                              |            |
| block size                          | 166,926 bp                           |                               |                                                                                              |            |
| variant count                       | 100 variants                         |                               |                                                                                              |            |
| <b>Basic features</b>               |                                      |                               |                                                                                              |            |
| <b>Conservation/deleteriousness</b> |                                      |                               | <b>Linked genes</b>                                                                          |            |
| phyloP                              | $\mu = -0.332$ [-3.743 – 0.859]      | gene(s) hit or close-by       | CYP4A11 <i>e!</i> , CYP4B1 <i>e!</i> , CYP4Z2P <i>e!</i>                                     |            |
| phastCons                           | $\mu = 0.101$ [0 – 0.808]            | eQTL gene(s)                  | CYP4B1 <i>e!</i> , HPDL <i>e!</i>                                                            |            |
| GERP++                              | $\mu = -0.225$ [-6.04 – 3.35]        | potentially regulated gene(s) | ATPAF1 <i>e!</i> , CYP4B1 <i>e!</i> , CYP4Z1 <i>e!</i> , MKNK1 <i>e!</i>                     |            |
| CADD score                          | $\mu = 3.807$ [0.04 – 23.9]          | disease gene(s)               | ATPAF1 <i>e!</i>                                                                             |            |
| <b>Trait annotations</b>            |                                      |                               |                                                                                              |            |
| <b>Variant association</b>          |                                      |                               |                                                                                              |            |
| trait                               | min(p-value)                         | source DB                     | source entry/link                                                                            | variant(s) |
| Blood metabolite levels             | <2.00×10 <sup>-61</sup>              | GWAS Catalog                  | 24816252  | 2          |
| Blood metabolite ratios             | <8.00×10 <sup>-86</sup>              | GWAS Catalog                  | 24816252  | 1          |
| Metabolic traits                    | <5.00×10 <sup>-32</sup>              | GWAS Catalog                  | 21886157  | 1          |

### Supplementary Figure 9: Example screenshot of a SNiPA annotation

SNiPA annotations for 435 out of 451 loci (sentinel SNPs and proxy variants in linkage disequilibrium  $r^2 > 0.8$ ; 16 sentinel SNPs were not available in the SNiPA database); SNiPA annotations for all 539 SNP-probe associations are provided as PDF files and can be accessed online. Continually updated annotations can also be retrieved using the SNiPA web server at <http://snipa.org> by entering the sentinel SNP identifier into the block-annotation tool.

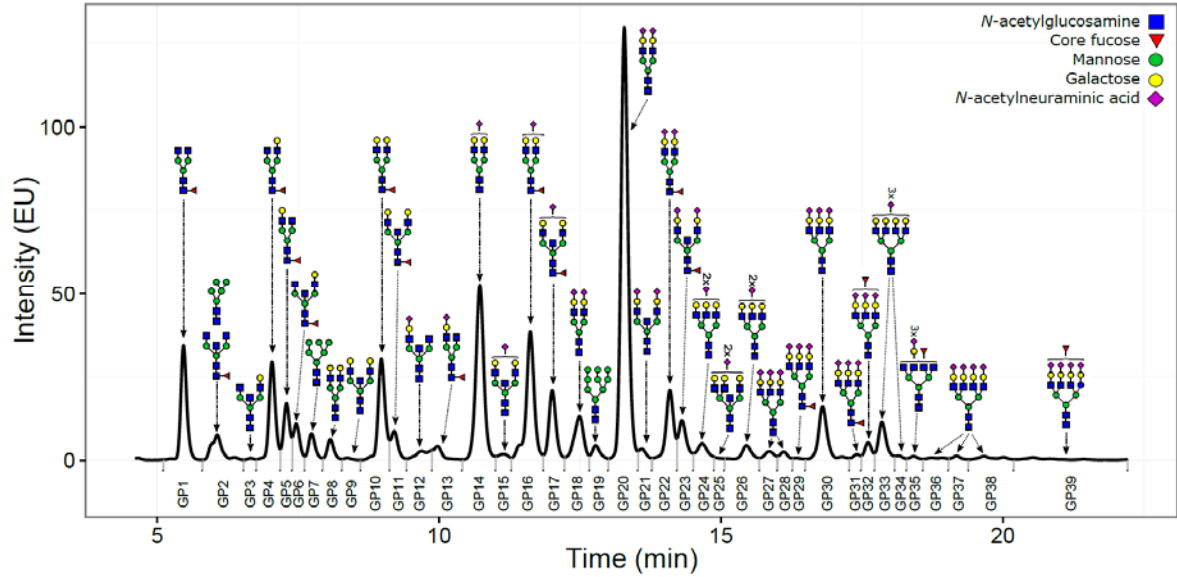

**Supplementary Figure 10: Representative chromatogram of a total plasma N-glycome.**

Fluorescently labelled plasma N-glycans were separated by HILIC-UPLC into 39 peaks (GP1-GP39). The glycan content in each peak was assigned as determined previously<sup>22</sup>. The amount of glycan species in each peak was expressed as % of total integrated area.

## SUPPLEMENTARY REFERENCES

1. Melzer, D. *et al.* A genome-wide association study identifies protein quantitative trait loci (pQTLs). *PLoS Genet.* **4**, e1000072 (2008).
2. Lourdusamy, A. *et al.* Identification of cis-regulatory variation influencing protein abundance levels in human plasma. *Hum. Mol. Genet.* **21**, 3719–3726 (2012).
3. Johansson, Å. *et al.* Identification of genetic variants influencing the human plasma proteome. *Proc. Natl. Acad. Sci. U. S. A.* **110**, 4673–8 (2013).
4. Kim, S. *et al.* Influence of Genetic Variation on Plasma Protein Levels in Older Adults Using a Multi-Analyte Panel. *PLoS One* **8**, (2013).
5. Liu, Y. *et al.* Quantitative variability of 342 plasma proteins in a human twin population. *Mol. Syst. Biol.* **11**, 786 (2015).
6. Enroth, S., Johansson, A., Enroth, S. B. & Gyllensten, U. Strong effects of genetic and lifestyle factors on biomarker variation and use of personalized cutoffs. *Nat. Commun.* **5**, 4684 (2014).
7. Carrasquillo, M. M. *et al.* Genome-wide screen identifies rs646776 near sortilin as a regulator of progranulin levels in human plasma. *Am. J. Hum. Genet.* **87**, 890–7 (2010).
8. van Dongen, J. *et al.* The contribution of the functional IL6R polymorphism rs2228145, eQTLs and other genome-wide SNPs to the heritability of plasma sIL-6R levels. *Behav. Genet.* **44**, 368–382 (2014).
9. Barbalic, M. *et al.* Large-scale genomic studies reveal central role of ABO in sP-selectin and sICAM-1 levels. *Hum. Mol. Genet.* **19**, 1863–72 (2010).
10. Ho, J. E. *et al.* Common genetic variation at the IL1RL1 locus regulates IL-33/ST2 signaling. *J. Clin. Invest.* **123**, 4208–18 (2013).
11. Heid, I. M. *et al.* Clear detection of ADIPOQ locus as the major gene for plasma adiponectin: Results of genome-wide association analyses including 4659 European individuals. *Atherosclerosis* **208**, 412–420 (2010).
12. Kaplan, R. C. *et al.* A genome-wide association study identifies novel loci associated with circulating IGF-I and IGFBP-3. *Hum. Mol. Genet.* **20**, 1241–51 (2011).
13. Zabaneh, D. *et al.* Genetic Variants Associated with von Willebrand Factor Levels in Healthy Men and Women Identified Using the HumanCVD BeadChip. *Ann. Hum. Genet.* **75**, 456–467 (2011).
14. Qi, L. *et al.* Genetic variants in ABO blood group region, plasma soluble E-selectin levels and risk of type 2 diabetes. *Hum. Mol. Genet.* **19**, 1856–1862 (2010).
15. Karakas, M. *et al.* A Variant In the Abo Gene Explains the Variation in Soluble E-Selectin Levels-Results from Dense Genotyping in Two Independent Populations. *PLoS One* **7**, 3–8 (2012).
16. Paré, G. *et al.* Genome-wide association analysis of soluble ICAM-1 concentration reveals novel associations at the NFKB1K, PNPLA3, RELA, and SH2B3 loci. *PLoS Genet.* **7**, e1001374 (2011).
17. Marzi, C. *et al.* Genome-wide association study identifies two novel regions at 11p15.5-p13 and 1p31 with major impact on acute-phase serum amyloid A. *PLoS Genet.* **6**, e1001213 (2010).
18. Yang, Q., Kathiresan, S., Lin, J.-P., Tofler, G. H. & O'Donnell, C. J. Genome-wide association and linkage analyses of hemostatic factors and hematological phenotypes in the Framingham Heart Study. *BMC Med. Genet.* **8 Suppl 1**, S12 (2007).
19. Froguel, P. *et al.* A genome-wide association study identifies rs2000999 as a strong genetic determinant of circulating haptoglobin levels. *PLoS One* **7**, e32327 (2012).
20. Hwang, S.-J., Yang, Q., Meigs, J. B., Pearce, E. N. & Fox, C. S. A genome-wide association for kidney function and endocrine-related traits in the NHLBI's Framingham Heart Study. *BMC*

- Med. Genet.* **8 Suppl 1**, S10 (2007).
21. Tang, W. *et al.* Genome-wide association study identifies novel loci for plasma levels of protein C: the ARIC study. *Blood* **116**, 5032–6 (2010).
  22. Saldova, R. *et al.* Association of N-glycosylation with breast carcinoma and systemic features using high-resolution quantitative UPLC. *J. Proteome Res.* **13**, 2314–2327 (2014).
